# Supplementary material
Source: PubMed Central journal article supplement (PMC1345647)

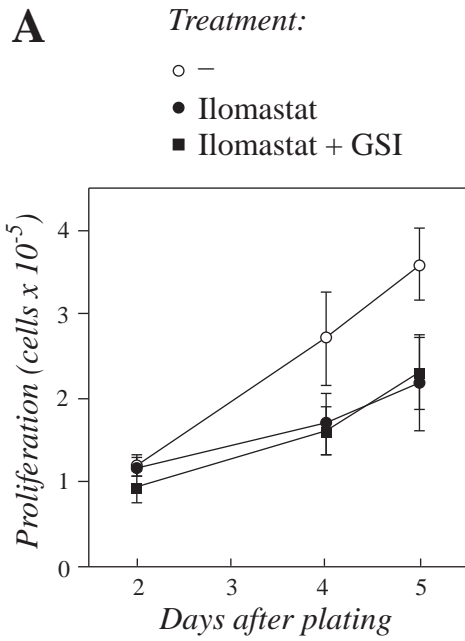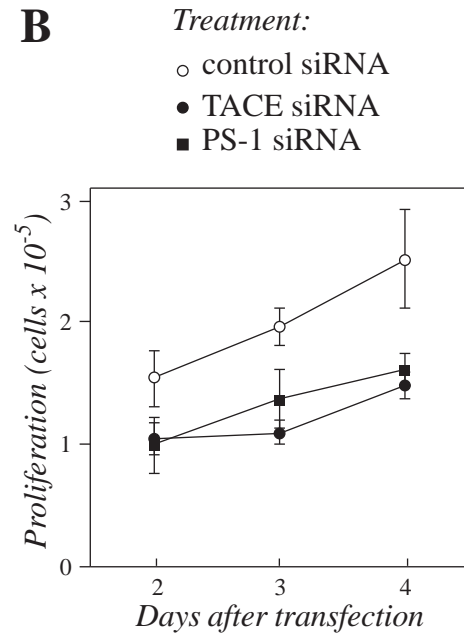

**Supplemental Fig. 1**

Supplement: mbc_E05-05-0402_2.pdf [file mbc_E05-05-0402_2.pdf]

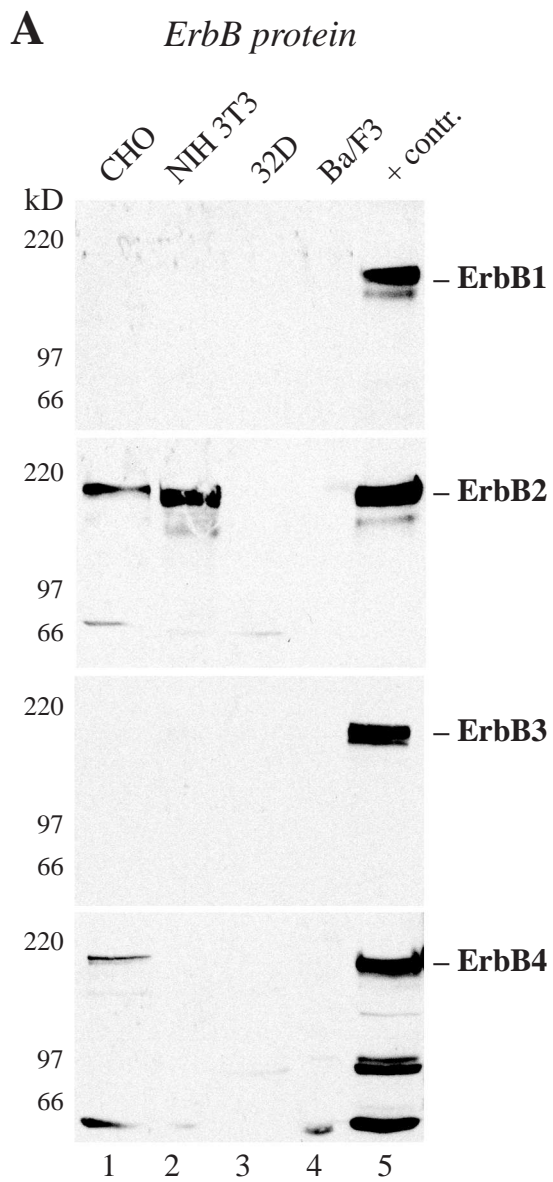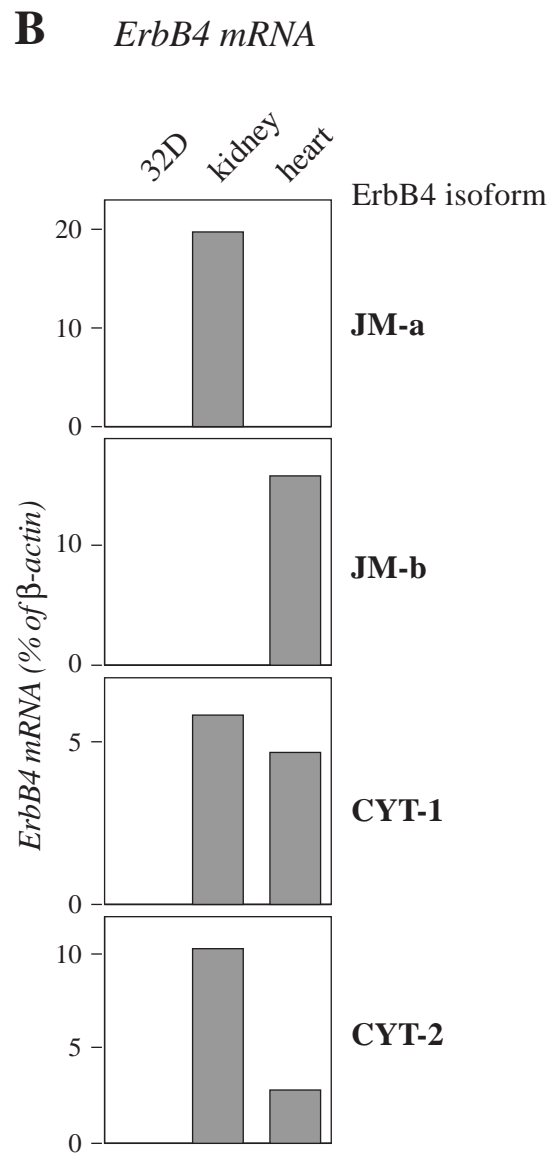

**Supplemental Fig. 2**

Supplement: mbc_E05-05-0402_3.pdf [file mbc_E05-05-0402_3.pdf]

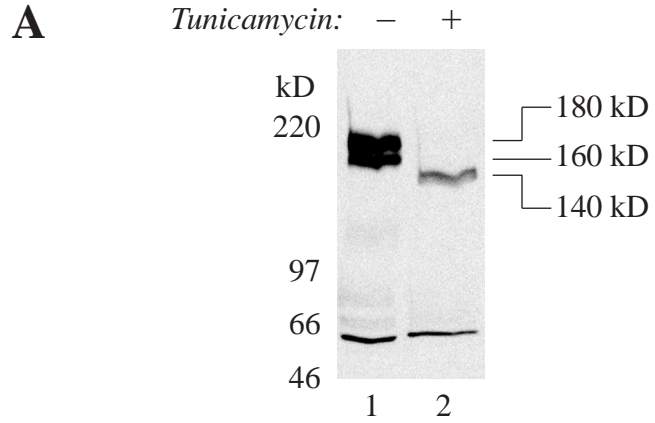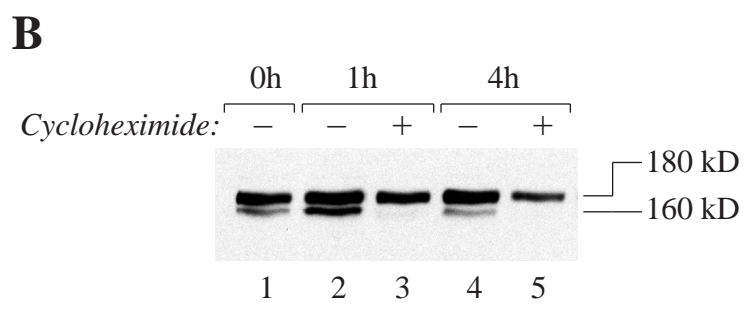

**Supplemental Fig. 3**

Supplement: mbc_E05-05-0402_4.pdf [file mbc_E05-05-0402_4.pdf]

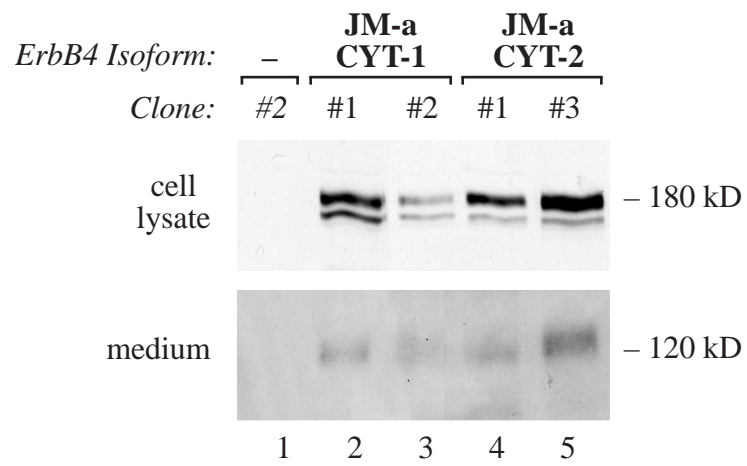

**Supplemental Fig. 4**

Supplement: mbc_E05-05-0402_5.pdf [file mbc_E05-05-0402_5.pdf]

**A**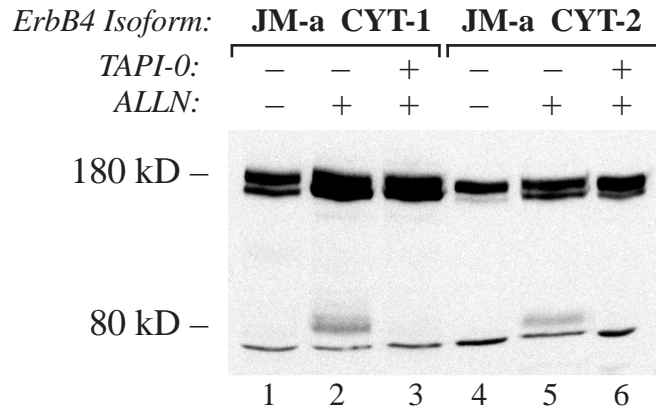**B**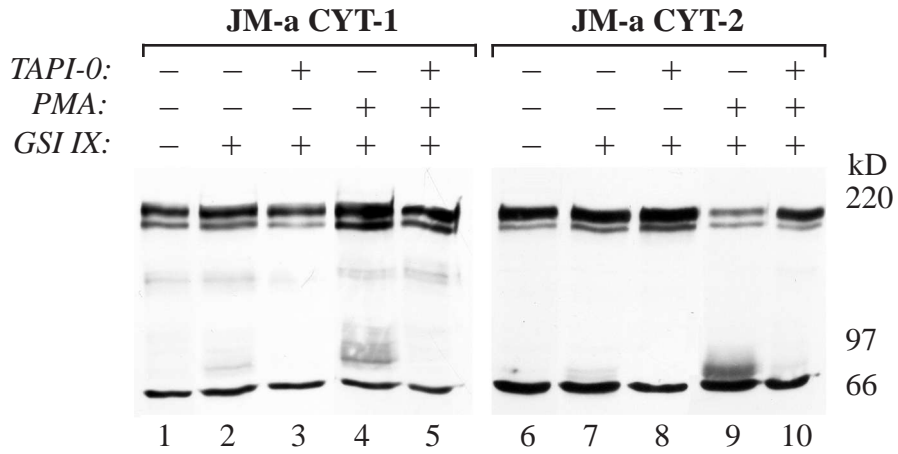**Supplemental Fig. 5**

Supplement: mbc_E05-05-0402_6.pdf [file mbc_E05-05-0402_6.pdf]
